# Supplementary material for: Zirconium and titanium amido complexes with 3,3-dimethyl-1,5-diaza-8-oxacyclodecane; facile C–H activation of the macrocyclic rim
Source: Royal Society of Chemistry journal article supplement (doi:10.1039/b418431a), 2005-01-01
Supplement: b418431a.doc [file b418431a.doc]

# Supplementary Data

Zirconium and titanium amido complexes with 3,3-dimethyl-1,5-diaza-8-oxacyclodecane; facile C-H activation of the macrocyclic rim

Robin M. Porter, Andreas A. Danopoulos,* Gillian Reid and Lisa R. Titcomb

*Department of Chemistry, University of Southampton, Highfield, Southampton, Hampshire, UK SO17 1BJ*

**[(NH)2O] -** H (C6D6) 0.79 (6H, s, C*H*3), 1.37 (2H, br s, N*H*), 2.46 (4H, d, *J* 7.5, NC*H*2C(CH3)2), 2.59 (4H, q, *J* 5.3, OCH2C*H*2), 3.45 (4H, t, *J* 5.1, OC*H*2CH2). C (C6D6) 24.98 (*C*H3), 35.79 (tertiary), 50.05 (N*C*H2C(CH3)2), 57.25 (OCH2*C*H2), 71.23 (O*C*H2CH2).

**[(NSiMe3)2O] -** H (C6D6) 0.09 (18H, s, Si*Me*3), 0.88 (6H, s, C*H*3), 2.91 (4H, s, NC*H*2C(CH3)2), 2.94-3.00 (4H, m, OCH2C*H*2), 3.48-3.52 (4H, m, OC*H*2CH2). C (C6D6) 0.40 (Si*Me*3), 28.03 (*C*H3), 39.43 (tertiary), 52.21 (N*C*H2C(CH3)2), 59.86 (OCH2*C*H2), 76.54 (O*C*H2CH2).

**Zr(N2O)2**: (NH2)O (0.149 g, 0.87 mmol) was dissolved in toluene (30 cm3) and cooled to –78 ºC. To the cooled solution, BunLi was added (0.75 cm3 of 2.45 M solution in hexanes, 1.82 mmol) and the solution stirred at –78 ºC for 0.5 h before rising to RT and stirring for 3 h. The solution was cooled to –78 ºC and a cooled (-78 ºC) solution of Zr(NEt2)2Cl2(thf)2 (0.407 g, 0.91 mmol) in toluene (20 cm3) was added slowly via cannula. The resultant yellow solution was stirred at –78 ºC for 0.5 h before rising to RT and stirring for 15 h to give a bright yellow solution with a fine white precipitate. The solution was filtered through Celite and the volatiles removed *in vacuo* and the residue extracted into diethyl ether (15 cm3) and cooled to –30 ºC to yield the compound as colourless crystals. X-ray diffraction quality crystals were grown from a saturated petroleum solution. Yield: 0.11 g, 57%. Found: C, 49.79 , H, 8.56 , N,12.81. Calculated for C18H36N4O2Zr, C, 50.08 , H, 8.40 , N, 12.98 %. H (C6D6) 0.96 (6H, s, CH3), 1.94 (6H, s, CH3), 2.42 (2H, d, *J*=12.1, NCH2C(CH3)2), 2.55-2.70 (6H, m), 3.37 (2H, ddd, *J* =4.1, 9.8, 11.3, OCH2CH2), 3.41-3.51 (2H, m), 3.47 (2H, d, *J* =10.2, NCH2C(CH3)2), 3.56 (2H, d, *J* =12.1, NCH2C(CH3)2), 3.67 (2H, dd, *J* =5.7, 9.8, OCH2CH2), 3.88 (2H, dd, *J* =4.9, 9.8, OCH2CH2), 4.22 (2H, ddd, *J* =5.3, 12.1, 14.7, OCH2CH2), 4.40 (2H, ddd, *J* =4.9, 11.7, 16.2, OCH2CH2). C (C6D6) 25.85, 29.50 (CH3), 38.81 (NCH2C(CH3)2), 52.33, 52.74 (NCH2C(CH3)2), 67.36, 67.38 (OCH2CH2), 77.17, 79.81 (OCH2CH2).

**[Ti(N2O)*(Benzyl)]2**: In the glove box, a C6H6 solution of Ti(CH2C6H5)4 (0.247 g, 0.598 mmol in 3cm3) was added to (NH)2O (0.103 g, 0.598 mmol in 2cm3) in a sample vial. Leaving the stoppered sample at RT for 16 h resulted in the crystallisation of [Ti(N2O)*(Benzyl)]2 as dark red, X-ray diffraction quality crystals. Yield: 0.050g. Found: C, 62.06, H, 7.66 , N, 8.90. Calculated for C32H48N4O2Ti2 C,62.34, H, 7.85, N, 9.09%. NMR data for [Ti(N2O)*(Benzyl)]2 could not be obtained due to its poor solubility in solvents that it does not react with.

**Observation of Ti(N2O)(Benzyl)2**. H (C6D6) 0.61 (3H, s, C*H*3), 0.90 (3H, s, C*H*3), 2.24 (2H, dt, *J* 4.7, 14.3,), 2.32 (2H, d, *J* 14.9, NC*H*2C(CH3)2), 2.68 (2H, ddd, *J* 5.6, 8.7, 10.3, ), 2.75 (2H, s, C*H*2C6H5), 3.03 (2H, s, C*H*2C6H5), 3.37 (2H, ddd, *J* 4.7, 5.6, 10.3, ), 3.70 (2H, ddd, *J* 5.6, 8.7, 14.3, ), 3.88 (2H, d, *J* 14.9, NC*H*2C(CH3)2), 6.85-7.35 (10H, m, CH2C6*H*5). C (C6D6) 28.39, 28.95 (*C*H3), 40.23 (tertiary), 56.44, 68.00, 74.38, 75.31, 82.54 (*C*H2C6H5), 121.14, 122.20, 126.81, 127.90, 128.50, 128.58 (aromatic *C*Hs), 146.09, 150.85 (quaternary aromatics).
